# Supplementary material for: Alantolactone Induces Apoptosis in HepG2 Cells through GSH Depletion, Inhibition of STAT3 Activation, and Mitochondrial Dysfunction
Source: Hindawi journal article supplement (doi:10.1155/2013/719858), 2012-12-27
Supplement: f1 [file 719858.f1.pdf]

## Supplementary Data

Figure 1

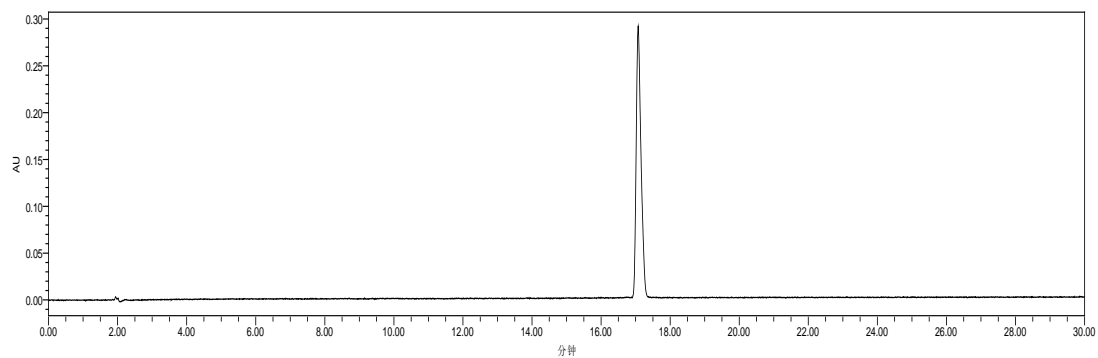

Purity of Alantolactone (99.12%) was determined by HPLC. HPLC were performed on a Waters XTerra C18 (4.6mm×150mm, 5μm). The mobile phase consisted of (A) acetonitrile containing 0.2% acetic acid and (B) 0.2% acetic acid in water with gradient elution: 0–15 min, 10–70% B; 15–30 min, 70–80% B; The temperature of autosampler was maintained at 25 °C and detection wavelength was 254nm.
